# Supplementary material for: Handcuffing intrinsically disordered regions in Mlh1–Pms1 disrupts mismatch repair
Source: PubMed Central journal article supplement — Nucleic Acids Res. 2021 Aug 14;49(16):9327–41. doi: 10.1093/nar/gkab694 (PMC8450099; doi:10.1093/nar/gkab694), 2021-08-14
Supplement: gkab694_supplemental_file.pdf [file gkab694_supplemental_file.pdf]

**Supplementary Information, Furman et al., Handcuffing intrinsically disordered regions in Mlh1-Pms1 disrupts mismatch repair**

**Supplementary Figure S1. Functional domains of yeast Mlh1 and Pms1.**

(A) Cartoon representations of the Mlh1 and Pms1 subunits, with the N-terminal ATP binding and C-terminal endonuclease/MLH interaction domains separated by IDRs. Amino acid locations of the domains in yeast Mlh1 and Pms1 are shown. IDR deletions that do not disrupt or only weakly disrupt Mlh1 or Pms1 functions (black lines) or confer *mlh1* or *pms1* null phenotypes (red lines), are shown (Plys *et al*, 2012). The green triangles indicate insertion sites for FRB and FKBP into the Mlh1 and Pms1 IDRs. FRB and FKBP were inserted immediately after the indicated amino acid position of Mlh1 and Pms1. (B) SDS-PAGE analysis (8% gel stained with Coomassie blue R250) of wild-type, Complex #2 (mlh1-FKBP<sub>464</sub>, pms1-FRB<sub>627</sub>), Complex #3 (mlh1-FRB<sub>464</sub>, pms1-FKBP<sub>460</sub>), Complex #4 (mlh1-FKBP<sub>464</sub>, pms1-FRB<sub>460</sub>), and Complex #5 (mlh1-FRB<sub>355</sub>-pms1-FKBP<sub>460</sub>). Complex #1 (mlh1-FRB<sub>355</sub>, FKBP<sub>464</sub>, PMS1) is shown in the right panel with a molecular weight standard and wild-type included for reference. Note the presence of higher molecular weight Mlh1-Pms1 complexes seen in this panel as described previously (Hall et al. 2001).

**Supplementary Figure S2. Analysis of Complex #2 (mlh1-FKBP<sub>464</sub>, pms1-FRB<sub>627</sub>) in DNA binding, ATP binding, and endonuclease assays.**

(A) MST analysis of Complex #2 in the presence and absence of 49 bp homoduplex DNA (20 nM), ATP (1 mM), and rapamycin (1  $\mu$ M). Three independent experiments were performed (error bars indicate the mean  $\pm$  standard deviation) using at least two independently purified batches of each protein.  $F_{norm}$  was calculated by dividing  $F_{hot}$  (average fluorescence value in the heated state) by  $F_{cold}$  (average fluorescence value measured in the cold state before the infrared laser is turned on) and plotted as parts per thousand (%). See the Materials and Methods for details. (B) ATP hydrolysis activity of Complex #2; (0.40  $\mu$ M) was determined in the presence

and absence of PCNA (0.250  $\mu$ M), 49-bp homoduplex DNA (0.75  $\mu$ M), and rapamycin (1  $\mu$ M). Error bars indicate  $\pm$  one standard deviation for three replicates. (C) Endonuclease activity of Complex #2 (50 nM) was determined on a closed circular DNA substrate (cc) in the presence (+) or absence (-) of MnSO<sub>4</sub>, ATP, rapamycin, and yeast PCNA/RFC (Materials and Methods). MnSO<sub>4</sub>, ATP, rapamycin, RFC and PCNA were included at 5 mM, 0.5 mM, 1  $\mu$ M, 125 nM and 250 nM, respectively. n= nicked product. (D) Endonuclease activities of Complex #2 were determined at the indicated concentrations. Assays were performed in the presence of MnSO<sub>4</sub>, ATP, RFC, PCNA. Rapamycin was included as indicated. Error-bars indicate the standard deviation of three replicates (Supplementary Figure S3). In panels B, C, and D, the analysis of Mlh1-Pms1 presented in Fig 3 is shown again for comparison purposes.

**Supplementary Figure S3. Gel images of protein titration endonuclease activity assays for wild-type, Complex #2 and Complex #5.** The assays shown in this figure were used to make the graphs presented in Figure 3D and Supplementary Figure S2D. Endonuclease assays (Materials and Methods) were performed on closed circular plasmid DNA in the presence of MnSO<sub>4</sub>, ATP, RFC, PCNA without (A) or with (B) rapamycin. cc = closed circular, n= nicked, l = linear.

**Supplementary Figure S4. Gel images of protein titration endonuclease activity assays for wild-type and Complex #1.** (A) Additional replicates of the assay shown in Figure 4C. Note that Assays 1 and 2 were performed with pUC18 DNA substrate and 3 and 4 with pUC19 DNA substrate. The "1/2" notation refers to conditions in which Mlh1-Pms1 and Complex #1 were present at 25 nM. (B) Individual titrations used to make the graph presented in Figure 4D. Endonuclease assays (Materials and Methods) were performed on closed circular plasmid DNA in the presence of Mlh1-Pms1, Complex #1, RFC, MnSO<sub>4</sub>, ATP at the concentrations presented in Figure 4C, and increasing concentrations of PCNA (12.5, 25, 50, 100, 200 nM) in the absence of rapamycin.

**Supplementary Table S1. Strains used in this study.**

Strains used in this study were derived from the S288c background.

**Supplementary Table S2. Plasmids used in this study.**

Full plasmid descriptions can be found in the Materials and Methods. *mlh1-FRB<sub>XXX</sub>*, *mlh1-FKBP<sub>XXX</sub>*, *pms1-FRB<sub>XXX</sub>*, and *pms1-FKBP<sub>XXX</sub>* refer to the amino acids (XXX) in Mlh1 or Pms1 immediately after which the FRB or FKBP domains were inserted (Figure 1; Materials and Methods).

**Supplementary Table S3. XL-MS lysine crosslinks for Mlh1-Pms1 (A), Complex 5 (B) and summary of intermolecular crosslinks for Mlh1-Pms1 and Complex #5 (C)**

Lower case k indicates site of cross-link

Uniprot: <https://www.uniprot.org>

Score: MaXLinker score (Yugandhar et al. 2020)

#CSMs: Number of cross-link spectrum matches

XL MH+: Deconvoluted mass of the cross-link. It is a standard practice to present the deconvoluted mass along with the mass of an additional H+

Z: Charge of the cross-link

XL m/z: Cross-link mass divided by its charge

**Supplementary Table S4. Phenotypic analysis of *mlh1* and *pms1* alleles that map within or near Mlh1-Pms1 crosslinking sites as determined by XL-MS**

+ indicates phenotype similar to wild-type, - indicates similar to MMR null, +/- intermediate phenotype.

## REFERENCES

- Arana ME, Holmes SF, Fortune JM, Moon AF, Pedersen LC, Kunkel TA (2010) Functional residues on the surface of the N-terminal domain of yeast Pms1. *DNA Repair* **9**, 448-457.
- Argueso JL, Kijas AW, Sarin S, Heck J, Waase M, Alani E (2003) Systematic mutagenesis of the *Saccharomyces cerevisiae* *MLH1* gene reveals distinct roles for Mlh1p in meiotic crossing over and in vegetative and meiotic mismatch repair. *Mol. Cell. Biol.* **23**, 873-886.
- Hall MC, and Kunkel TA (2001) Purification of eukaryotic MutL homologs from *Saccharomyces cerevisiae* using self-cleaving affinity technology. *Prot. Exp. Purif.*, **21**, 333-342.
- Hall MC, Shcherbakova PV, Fortune JM, Borchers CH, Dial JM, Tomer KB, Kunkel TA (2003) DNA binding by yeast Mlh1 and Pms1: implications for DNA mismatch repair. *Nucleic Acids Res.* **31**, 2025-2034.
- Plys AJ, Rogacheva MV, Greene EC, Alani E (2012) The unstructured linker arms of Mlh1-Pms1 are important for interactions with DNA during mismatch repair. *J Mol Biol* **422**, 192-203.
- Tran PT, Liskay RM (2000) Functional studies on the candidate ATPase domains of *Saccharomyces cerevisiae* MutLalpha. *Mol. Cell. Biol.* **20**, 6390-6398.
- Smith CE, Mendillo ML, Bowen N, Hombauer H, Campbell CS, Desai A, Putnam CD, Kolodner RD (2013) Dominant mutations in *S. cerevisiae* *PMS1* identify the Mlh1-Pms1 endonuclease active site and an exonuclease 1-independent mismatch repair pathway. *PLoS Genet.* **9**, e1003869.
- Yugandhar K, Wang TY, Leung AKY, Lanz MC, Motorykin I, Liang J, Shayhidin EE, Smolka MB, Zhang S, Yu H (2020) MaXLinker: proteome-wide cross-link identifications with high specificity and sensitivity. *Mol. Cell. Proteomics* **19**, 554-568.

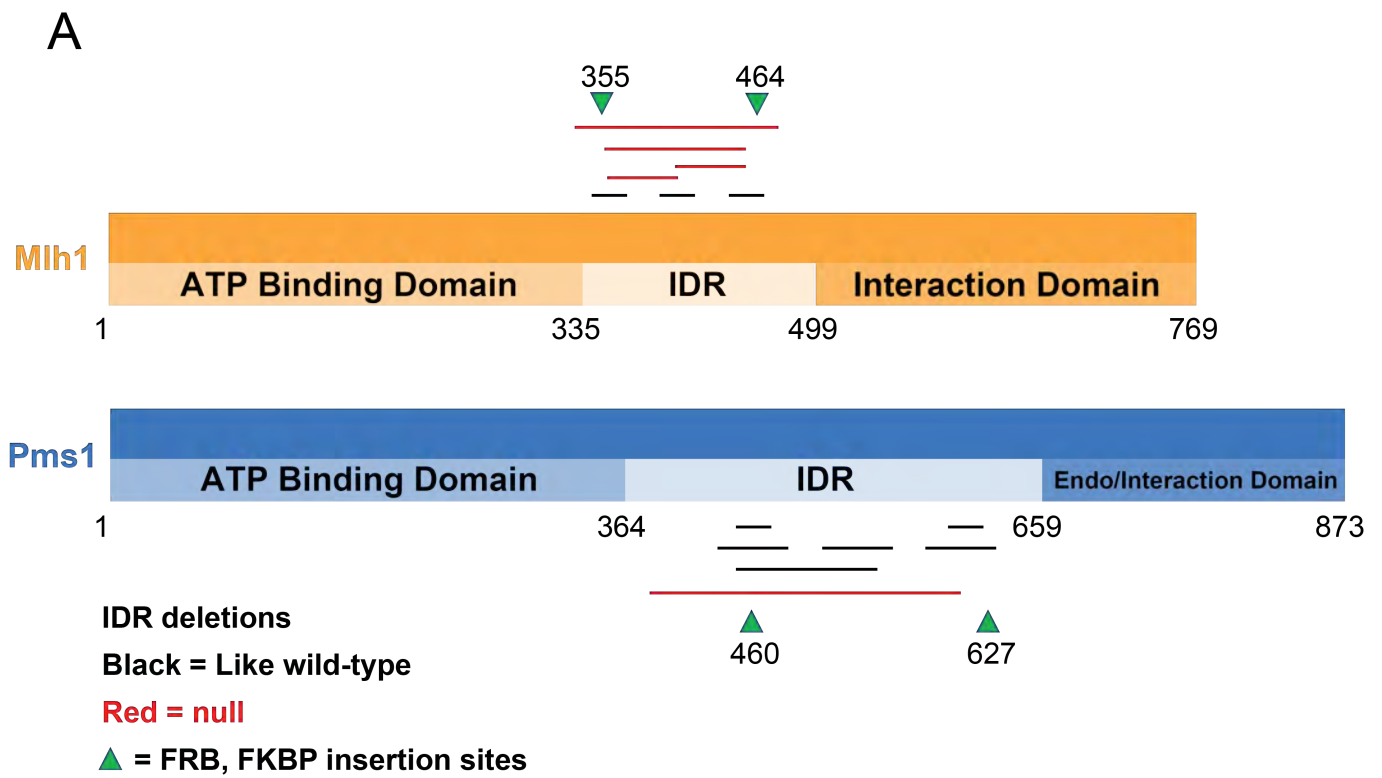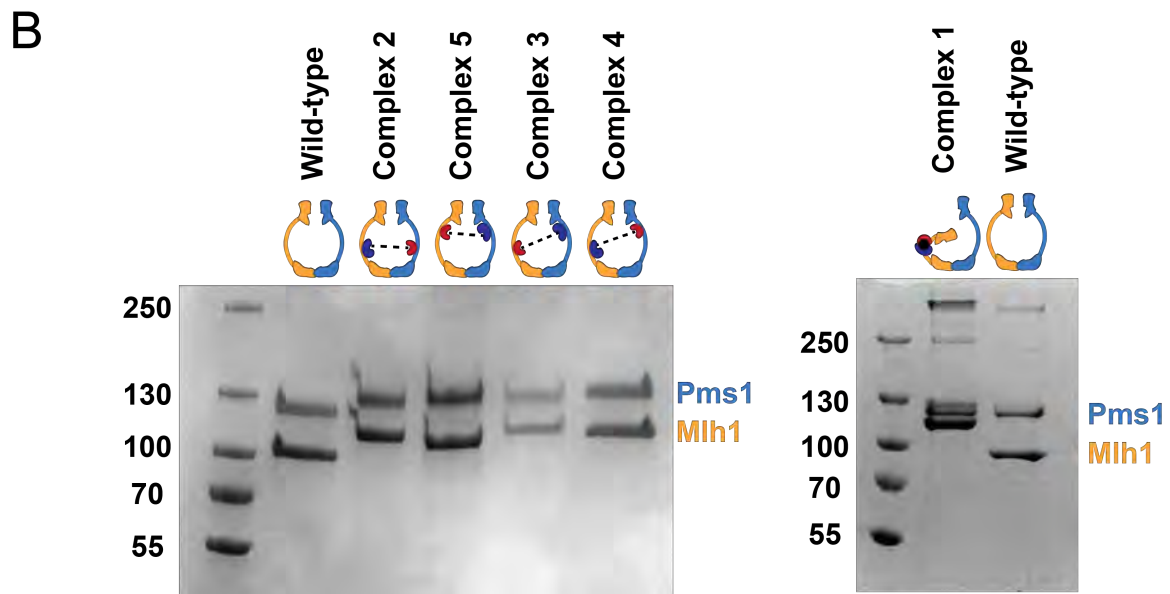

Figure S1

**A**

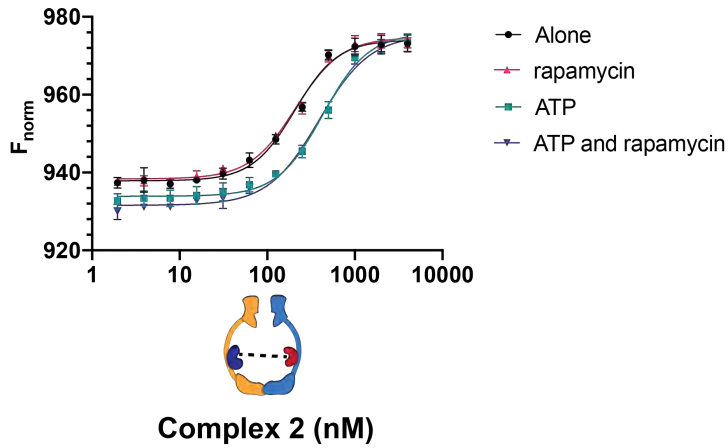

**B**

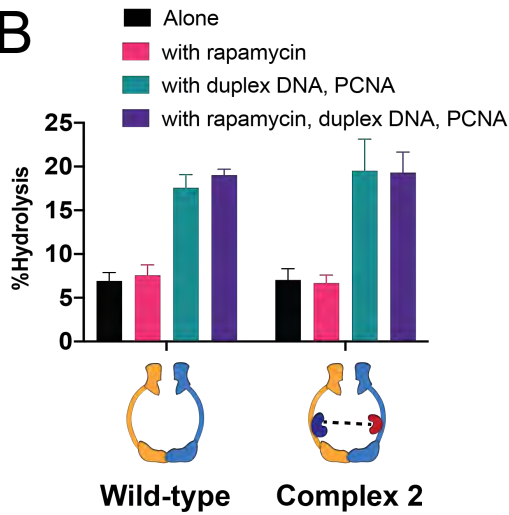

**C**

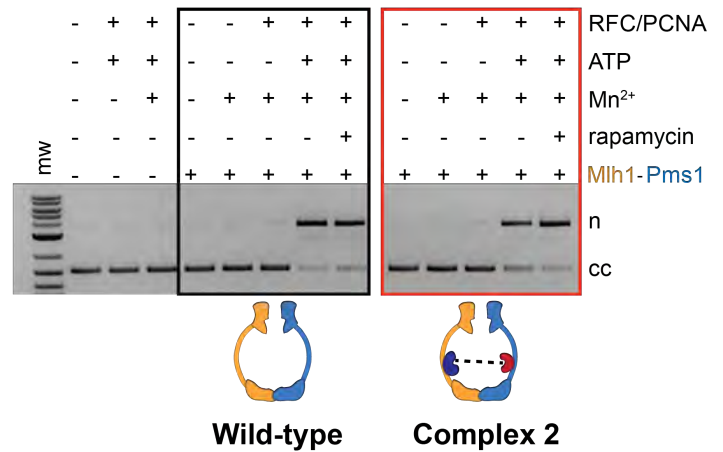

**D**

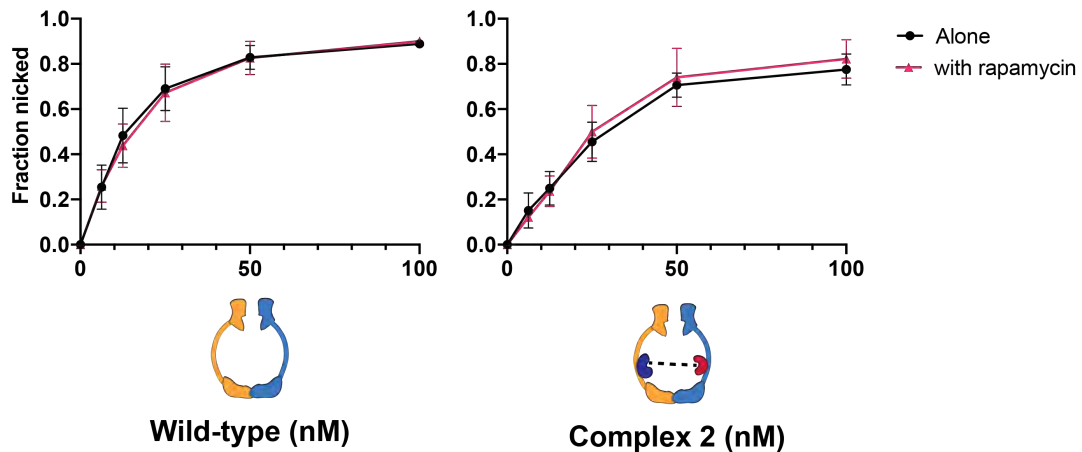

Figure S2

**A**

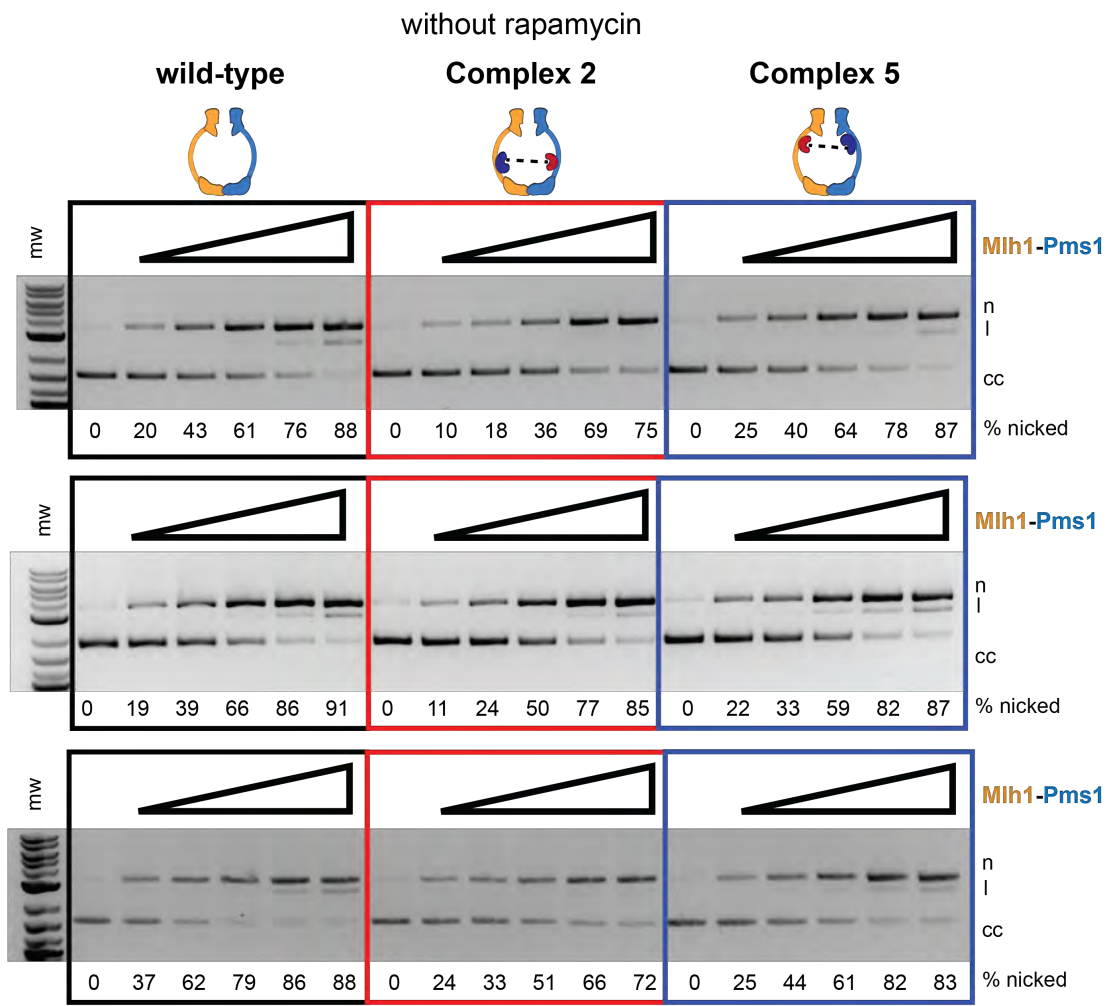

**B**

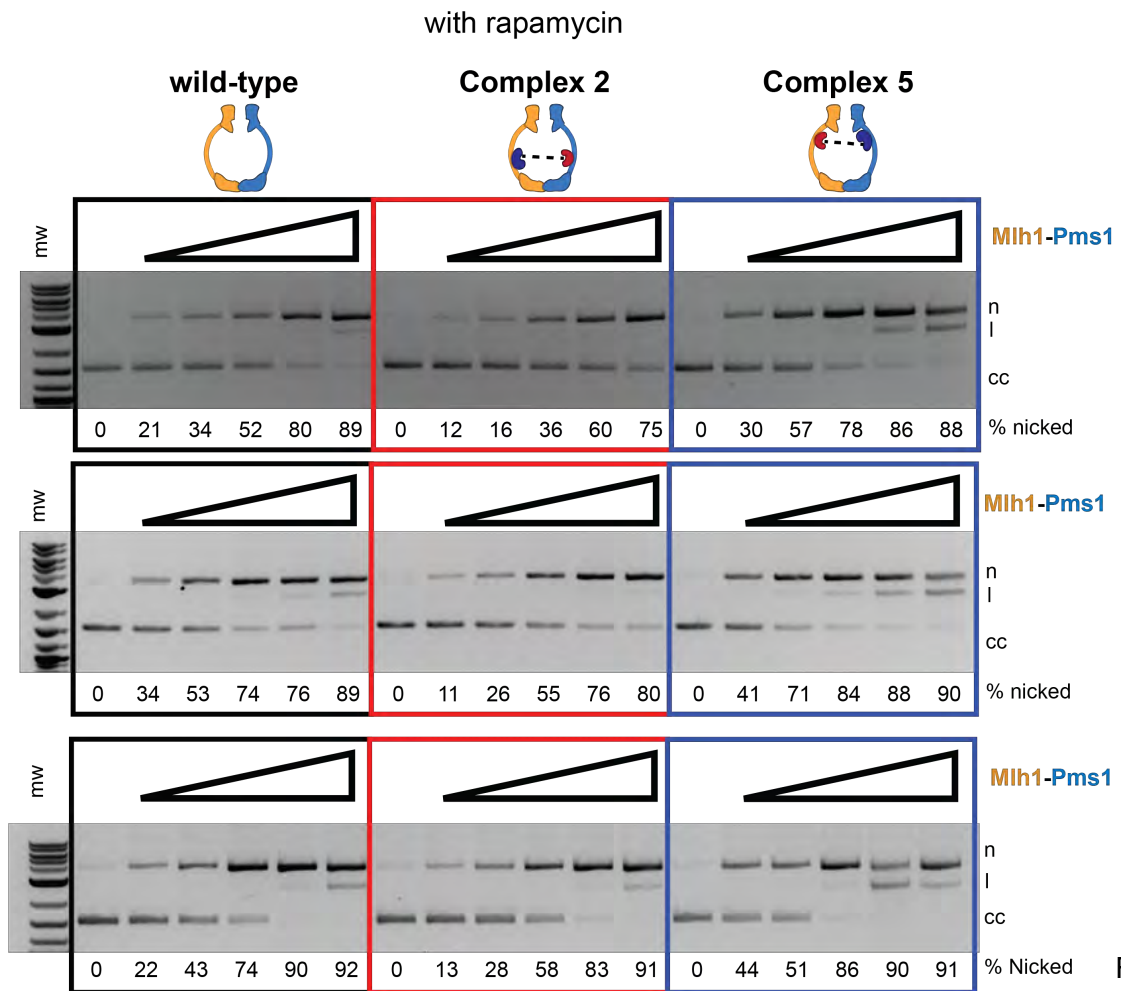

Fig. S3

**A**

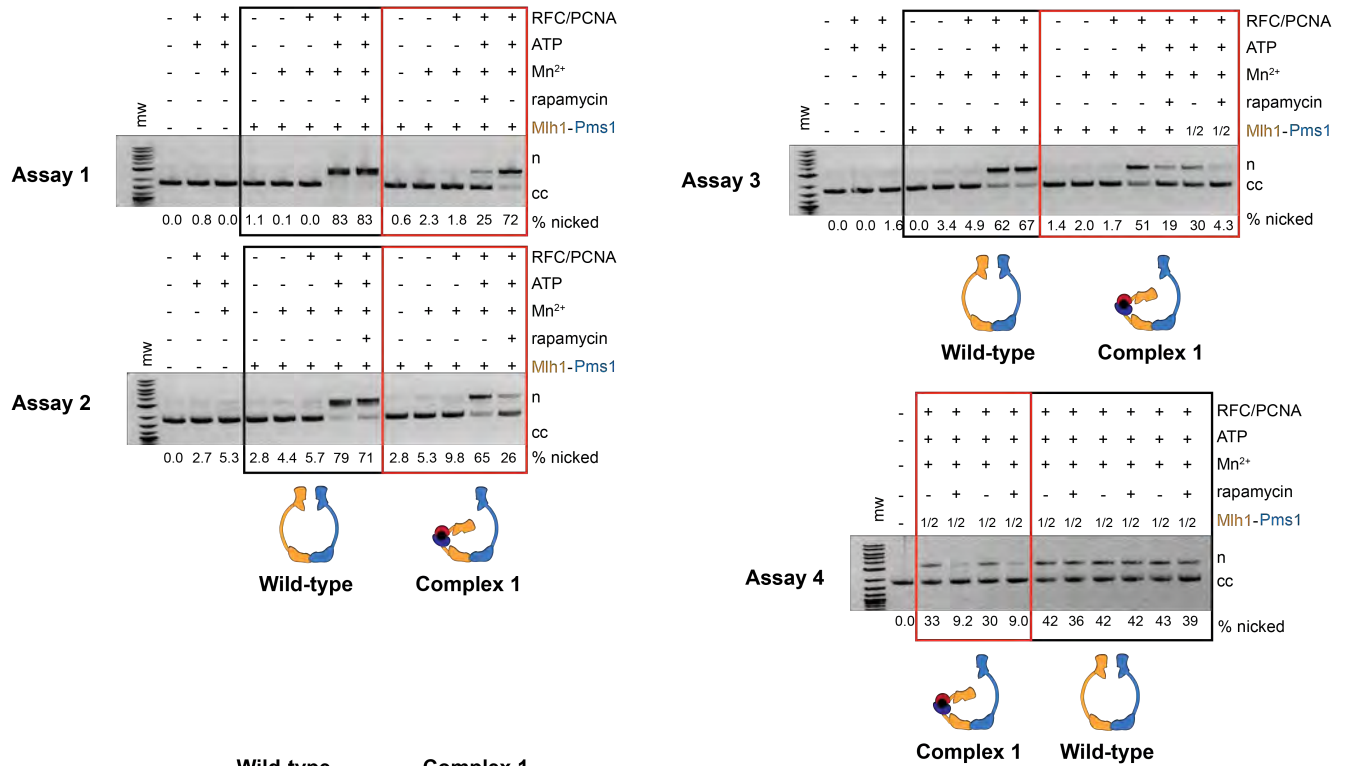

**B**

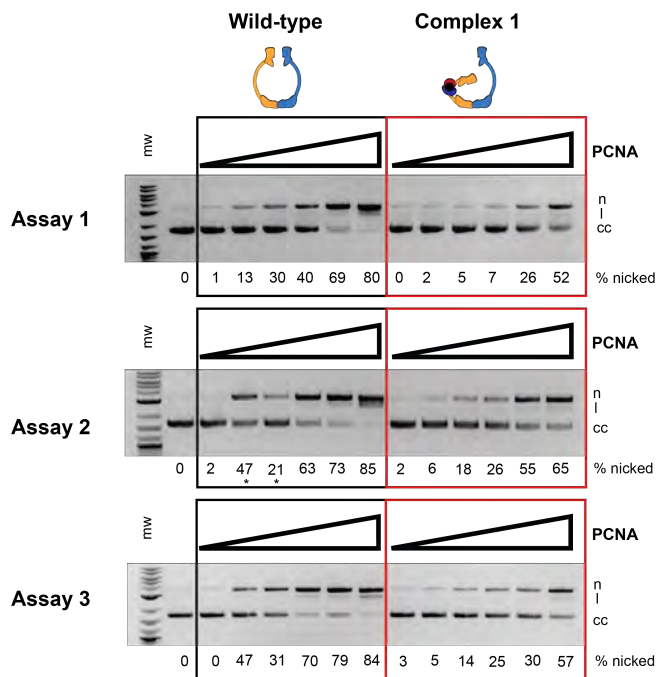

Figure S4



**Table S1. Strains used in this study**

---

|                                       |                                                                                                                                                  |
|---------------------------------------|--------------------------------------------------------------------------------------------------------------------------------------------------|
| EAY1269                               | <i>MATa, ura3-52, leu2Δ1, trp1Δ63, lys2::insE-A14</i>                                                                                            |
| EAY4209-4211                          | <i>MATa, ura3-52, leu2Δ1, trp1Δ63, lys2::insE-A14, tor1-1-S1972A</i>                                                                             |
| EAY4212-4215, 4449                    | <i>MATa, ura3-52, leu2Δ1, trp1Δ63, lys2::insE-A14, tor1-1-S1972A, fpr1Δ::KANMX</i>                                                               |
| EAY4450                               | <i>MATa, ura3-52, leu2Δ1, trp1Δ63, lys2::insE-A14, tor1-1-S1972A, fpr1Δ::NATMX</i>                                                               |
| EAY4488-4490                          | <i>MATa, ura3-52, leu2Δ1, trp1Δ63, lys2::insE-A14, tor1-1-S1972A, fpr1Δ::NATMX, mlh1Δ::KANMX</i>                                                 |
| JJY70                                 | <i>MATa, fpr1Δ::NAT, tor1-1, leu2-3,112, ura3-52, his3-Δ200, trp1-Δ901, suc2-Δ9 lys2-801; GAL</i>                                                |
| BJ2168                                | <i>MATa, ura3-52, leu2-3, 112, trp1-289, prb1-1122, prc1-407, pep4-3</i>                                                                         |
| <b><i>mlh1</i> integrations</b>       |                                                                                                                                                  |
| EAY4470-4471                          | <i>MATa, ura3-52, leu2Δ1, trp1Δ63, lys2::insE-A14, tor1-1-S1972A, fpr1Δ::NATMX, mlh1-FKBP<sub>464</sub>::KANMX</i>                               |
| EAY4472-4473                          | <i>MATa, ura3-52, leu2Δ1, trp1Δ63, lys2::insE-A14, tor1-1-S1972A, fpr1Δ::NATMX, mlh1-FRB<sub>355</sub>::KANMX</i>                                |
| EAY4474-4475,4491                     | <i>MATa, ura3-52, leu2Δ1, trp1Δ63, lys2::insE-A14, tor1-1-S1972A, fpr1Δ::NATMX, mlh1-FRB<sub>464</sub>::KANMX</i>                                |
| EAY4598-4600                          | <i>MATa, ura3-52, leu2Δ1, trp1Δ63, lys2::insE-A14, tor1-1-S1972A, fpr1Δ::NATMX, mlh1-FRB<sub>355</sub>,FKBP<sub>464</sub>::KANMX</i>             |
| <b><i>pms1</i> integrations</b>       |                                                                                                                                                  |
| EAY4492-4494, 4504                    | <i>MATa, ura3-52, leu2Δ1, trp1Δ63, lys2::insE-A14, tor1-1-S1972A, fpr1Δ::NATMX, pms1-FRB<sub>460</sub>::LEU2</i>                                 |
| EAY4495-4496, 4505                    | <i>MATa, ura3-52, leu2Δ1, trp1Δ63, lys2::insE-A14, tor1-1-S1972A, fpr1Δ::NATMX, pms1-FKBP<sub>460</sub>::LEU2</i>                                |
| EAY4497-4498, 4506                    | <i>MATa, ura3-52, leu2Δ1, trp1Δ63, lys2::insE-A14, tor1-1-S1972A, fpr1Δ::NATMX, pms1-FRB<sub>627</sub>::LEU2</i>                                 |
| EAY4499-4500, 4507                    | <i>MATa, ura3-52, leu2Δ1, trp1Δ63, lys2::insE-A14, tor1-1-S1972A, fpr1Δ::NATMX, pms1-FKBP<sub>627</sub>::LEU2</i>                                |
| <b><i>mlh1, pms1</i> integrations</b> |                                                                                                                                                  |
| EAY4451-4452, 4486                    | <i>MATa, ura3-52, leu2Δ1, trp1Δ63, lys2::insE-A14, tor1-1-S1972A, fpr1Δ::NATMX, mlh1-FKBP<sub>464</sub>::KANMX, pms1-FRB<sub>627</sub>::LEU2</i> |
| EAY4453-4454, 4508                    | <i>MATa, ura3-52, leu2Δ1, trp1Δ63, lys2::insE-A14, tor1-1-S1972A, fpr1Δ::NATMX, mlh1-FRB<sub>464</sub>::KANMX, pms1-FKBP<sub>460</sub>::LEU2</i> |
| EAY4455-4456, 4509                    | <i>MATa, ura3-52, leu2Δ1, trp1Δ63, lys2::insE-A14, tor1-1-S1972A, fpr1Δ::NATMX, mlh1-FKBP<sub>464</sub>::KANMX, pms1-FRB<sub>460</sub>::LEU2</i> |
| EAY4457-4458, 4487                    | <i>MATa, ura3-52, leu2Δ1, trp1Δ63, lys2::insE-A14, tor1-1-S1972A, fpr1Δ::NATMX, mlh1-FRB<sub>355</sub>::KANMX, pms1-FKBP<sub>460</sub>::LEU2</i> |
| EAY4501-4503                          | <i>MATa, ura3-52, leu2Δ1, trp1Δ63, lys2::insE-A14, tor1-1-S1972A, fpr1Δ::NATMX, mlh1-FRB<sub>355</sub>::KANMX, pms1-FKBP<sub>627</sub>::LEU2</i> |

---

Strains used in this study were derived from the S288c background.

**Table S2. Plasmids used in this study**

| Plasmid | Relevant genotype                                                | Vector type                | Source                    |
|---------|------------------------------------------------------------------|----------------------------|---------------------------|
| pRS415  | empty vector                                                     | <i>ARS-CEN, LEU2</i>       | Christianson et al., 1992 |
| pRS416  | empty vector                                                     | <i>ARS-CEN, URA3</i>       | Christianson et al., 1992 |
| pEAA213 | <i>MLH1::KANMX</i>                                               | <i>ARS-CEN, LEU2</i>       | Alani lab                 |
| pEAA238 | <i>PMS1</i>                                                      | <i>ARS-CEN, HIS3</i>       | Alani lab                 |
| pEAA248 | <i>MLH1</i>                                                      | <i>ARS-CEN, URA3</i>       | Alani lab                 |
| pEAA67  | <i>MLH1, PMS1, MSH2</i>                                          | <i>ARS-CEN, URA3</i>       | Alani lab                 |
| pEAA672 | <i>mlh1-FRB<sub>355</sub>::KANMX</i>                             | <i>ARS-CEN, LEU2</i>       | Alani lab; this study     |
| pEAA674 | <i>mlh1-FKBP<sub>464</sub>::KANMX</i>                            | <i>ARS-CEN, LEU2</i>       | Alani lab; this study     |
| pEAA675 | <i>mlh1-FRB<sub>464</sub>::KANMX</i>                             | <i>ARS-CEN, LEU2</i>       | Alani lab; this study     |
| pEAA713 | <i>mlh1-FRB<sub>355</sub>,FKBP<sub>464</sub>::KANMX</i>          | <i>ARS-CEN, LEU2</i>       | Alani lab; this study     |
| pEAA676 | <i>pms1-FRB<sub>460</sub></i>                                    | <i>ARS-CEN, HIS3</i>       | Alani lab; this study     |
| pEAA677 | <i>pms1-FKBP<sub>460</sub></i>                                   | <i>ARS-CEN, HIS3</i>       | Alani lab; this study     |
| pEAA678 | <i>pms1-FRB<sub>627</sub></i>                                    | <i>ARS-CEN, HIS3</i>       | Alani lab; this study     |
| pEAA671 | <i>pms1-FKBP<sub>627</sub></i>                                   | <i>ARS-CEN, HIS3</i>       | Alani lab; this study     |
| pEAE448 | <i>GAL1-mlh1-FRB<sub>355</sub>(FLAG<sub>499</sub>)-VMA1-CBD</i>  | <i>2μ, TRP1</i>            | Alani lab; this study     |
| pEAE447 | <i>GAL1-mlh1-FKBP<sub>464</sub>(FLAG<sub>499</sub>)-VMA1-CBD</i> | <i>2μ, TRP1</i>            | Alani lab; this study     |
| pEAE446 | <i>GAL1-mlh1-FRB<sub>464</sub>(FLAG<sub>499</sub>)-VMA1-CBD</i>  | <i>2μ, TRP1</i>            | Alani lab; this study     |
| pEAE460 | <i>GAL1- mlh1-FRB<sub>355</sub>,FKBP<sub>464</sub>-VMA1-CBD</i>  | <i>2μ, TRP1</i>            | Alani lab; this study     |
| pEAE435 | <i>GAL10-pms1-FRB<sub>460</sub></i>                              | <i>2μ, LEU2</i>            | Alani lab; this study     |
| pEAE433 | <i>GAL10-pms1-FKBP<sub>460</sub></i>                             | <i>2μ, LEU2</i>            | Alani lab; this study     |
| pEAE431 | <i>GAL10-pms1-FRB<sub>627</sub></i>                              | <i>2μ, LEU2</i>            | Alani lab; this study     |
| pEAI453 | <i>pms1-FRB<sub>460</sub>::LEU2</i>                              | <i>ARS-CEN, LEU2, HIS3</i> | Alani lab; this study     |
| pEAI454 | <i>pms1-FKBP<sub>460</sub>::LEU2</i>                             | <i>ARS-CEN, LEU2, HIS3</i> | Alani lab; this study     |
| pEAI455 | <i>pms1-FRB<sub>627</sub>::LEU2</i>                              | <i>ARS-CEN, LEU2, HIS3</i> | Alani lab; this study     |
| pEAI468 | <i>pms1-FKBP<sub>627</sub>::LEU2</i>                             | <i>ARS-CEN, LEU2, HIS3</i> | Alani lab; this study     |
| pEAI160 | <i>mlh1Δ::KANMX</i>                                              | <i>Integration</i>         | Alani lab                 |
| pEAE269 | <i>GAL1-MLH1(FLAG<sub>499</sub>)-VMA1-CBD</i>                    | <i>2μ, TRP1</i>            | Alani lab                 |
| pMH8    | <i>GAL10-PMS1</i>                                                | <i>2μ, LEU2</i>            | Hall and Kunkel, 2001     |

Full plasmid descriptions can be found in the Materials and Methods. *mlh1-FRB<sub>xxx</sub>*, *mlh1-FKBP<sub>xxx</sub>*, *pms1-FRB<sub>xxx</sub>*, and *pms1-FKBP<sub>xxx</sub>* refer to the amino acids (XXX) in Mlh1 or Pms1 immediately after which the FRB or FKBP domains were inserted (Figure 1; Materials and Methods).



|       |   |          |   |          |                   |             |            |                       |             |            |
|-------|---|----------|---|----------|-------------------|-------------|------------|-----------------------|-------------|------------|
| 40.74 | 2 | 1608.863 | 4 | 402.9717 | QKEFSK            | Pms1-P14242 | N-Term-159 | klPSIK                | Pms1-P14242 | Linker-468 |
| 40    | 1 | 2965.459 | 4 | 742.1207 | DANTINDNDLKDQPKKK | Mlh1-P38920 | Linker-471 | QkLGDYK               | Mlh1-P38920 | Linker-475 |
| 40    | 1 | 2993.34  | 4 | 749.0908 | mcSQSEQQAQKR      | Pms1-P14242 | Linker-377 | kNISSVFGAGGmR         | Pms1-P14242 | N-Term-213 |
| 40    | 1 | 2868.362 | 4 | 717.8463 | SISKDNVYR         | Pms1-P14242 | Linker-591 | kFEDEILEVNLSTK        | Pms1-P14242 | Linker-605 |
| 40    | 1 | 2081.095 | 4 | 521.0297 | QKEFSK            | Pms1-P14242 | N-Term-159 | IkALDASVVNK           | Mlh1-P38920 | N-Term-6   |
| 39.98 | 1 | 3058.582 | 5 | 612.5226 | VPKER             | Mlh1-P38920 | C-Term-504 | LGDYkVPSIADDEKNALPISK | Mlh1-P38920 | Linker-480 |
| 39.96 | 1 | 1891.99  | 4 | 473.7535 | NSkDR             | Pms1-P14242 | N-Term-278 | VNVNLTSlkK            | Mlh1-P38920 | C-Term-515 |
| 39.91 | 1 | 2930.352 | 4 | 733.3438 | NGkQMSSlISK       | Pms1-P14242 | Linker-628 | NkDELEDFEQGEK         | Pms1-P14242 | Linker-649 |
| 39.87 | 1 | 2008.037 | 4 | 502.7651 | VPKER             | Mlh1-P38920 | C-Term-504 | VcNLNFIkSkK           | Mlh1-P38920 | N-Term-253 |
| 39.86 | 1 | 1559.759 | 4 | 390.6956 | kTMTR             | Pms1-P14242 | C-Term-830 | QKEFSK                | Pms1-P14242 | N-Term-159 |
| 39.56 | 1 | 2343.127 | 4 | 586.5375 | kTMTR             | Pms1-P14242 | C-Term-830 | LGDYkVPSIADDEK        | Mlh1-P38920 | Linker-480 |
| 29.82 | 1 | 3287.701 | 4 | 822.681  | IkALDASVVNK       | Mlh1-P38920 | N-Term-6   | LQkFEDLSlQlTYGFR      | Mlh1-P38920 | N-Term-84  |
| 29.78 | 1 | 1751.9   | 4 | 438.7308 | DQPKKK            | Mlh1-P38920 | Linker-471 | QkLGDYK               | Mlh1-P38920 | Linker-475 |
| 29.52 | 1 | 2934.349 | 4 | 734.3432 | kTmTR             | Pms1-P14242 | C-Term-830 | VDTSDASLSEDEkAQFINR   | Mlh1-P38920 | C-Term-717 |
| 19.78 | 1 | 1584.828 | 4 | 396.9629 | kSlSK             | Pms1-P14242 | Linker-589 | NkFEISK               | Pms1-P14242 | C-Term-621 |

#### Definitions

lower case k indicates site of cross-link

Uniprot: <https://www.uniprot.org>

Score: MaxLinker score; see Yugandhar et al. (2020) Mol. Cell Proteomics 19, 554-568 (2020).

#CSMs: Number of cross-link spectrum matches

XL MH+: Deconvoluted mass of the cross-link. It is a standard practice to present the deconvoluted mass along with the mass of an additional H+

Z: Charge of the cross-link

XL m/z: Cross-link mass divided by its charge



|       |   |          |   |          |                    |             |            |                            |             |            |
|-------|---|----------|---|----------|--------------------|-------------|------------|----------------------------|-------------|------------|
| 59.95 | 1 | 1785.842 | 4 | 447.2163 | VkEDR              | Mh1-P38920  | N-Term-117 | SISKDNYR                   | Pms1-P14242 | Linker-591 |
| 59.95 | 1 | 2200.016 | 4 | 550.7598 | McSQSEQQAQQR       | Pms1-P14242 | Linker-377 | KSISK                      | Pms1-P14242 | Linker-589 |
| 59.93 | 1 | 2286.03  | 4 | 572.2634 | McSQSEQQAQQR       | Pms1-P14242 | Linker-377 | TFPKR                      | Pms1-P14242 | FKBP-17    |
| 59.93 | 1 | 3225.534 | 4 | 807.1393 | MLGKYTDOPDFLDDLYK  | Pms1-P14242 | N-Term-246 | IAKfQDVAK                  | Pms1-P14242 | N-Term-83  |
| 59.92 | 1 | 1559.756 | 4 | 390.6948 | KTMTR              | Pms1-P14242 | C-Term-830 | QkEFSK                     | Pms1-P14242 | N-Term-159 |
| 59.9  | 1 | 1967.995 | 4 | 492.7546 | KSISK              | Pms1-P14242 | Linker-589 | LEGSNSSTPTKK               | Pms1-P14242 | Linker-467 |
| 59.88 | 1 | 1635.83  | 4 | 409.7134 | cSkIR              | Pms1-P14242 | C-Term-807 | TPLKNSR                    | Pms1-P14242 | Linker-583 |
| 59.86 | 1 | 1661.828 | 4 | 416.2128 | KSISK              | Pms1-P14242 | Linker-589 | YmKSGNVK                   | Mh1-P38920  | FRB-70     |
| 59.85 | 1 | 3214.525 | 5 | 643.7113 | YmKSGNVK           | Mh1-P38920  | FRB-70     | NVKGMEVLEPLHAMMER          | Mh1-P38920  | FRB-25     |
| 59.82 | 1 | 1755.897 | 4 | 439.7301 | VkEDR              | Mh1-P38920  | N-Term-117 | FTTSkLQK                   | Mh1-P38920  | N-Term-81  |
| 59.8  | 1 | 1942.012 | 4 | 486.2588 | KSISK              | Pms1-P14242 | Linker-589 | VcNLNFISKK                 | Mh1-P38920  | N-Term-253 |
| 59.77 | 1 | 4007.996 | 4 | 1002.755 | RQENKLVLR          | Mh1-P38920  | Linker-398 | IDASQAKITSFLSSSQQFNFEQSSTK | Mh1-P38920  | Linker-408 |
| 59.77 | 1 | 2425.204 | 4 | 607.057  | IAKfQDVAK          | Pms1-P14242 | N-Term-83  | LEGSNSSTPTKK               | Pms1-P14242 | Linker-467 |
| 59.64 | 1 | 1877.041 | 4 | 470.0161 | KSISK              | Pms1-P14242 | Linker-589 | IkALDASVVNK                | Mh1-P38920  | N-Term-6   |
| 40    | 1 | 2209.136 | 4 | 553.04   | TPLKNSR            | Pms1-P14242 | Linker-583 | FmLGQEVIR                  | Pms1-P14242 | FKBP-52    |
| 39.99 | 1 | 3385.775 | 4 | 847.1997 | TVFNKSVASNLITFHISK | Mh1-P38920  | N-Term-219 | VcNLNFISKK                 | Mh1-P38920  | N-Term-253 |
| 39.99 | 1 | 2343.124 | 4 | 586.5369 | KTMTR              | Pms1-P14242 | C-Term-830 | LGDYKVPsIAADDEK            | Mh1-P38920  | Linker-480 |
| 39.97 | 1 | 1679.855 | 4 | 420.7197 | KTMTR              | Pms1-P14242 | C-Term-830 | QENKLVLR                   | Mh1-P38920  | Linker-398 |
| 39.96 | 1 | 2335.156 | 4 | 584.545  | VPKER              | Mh1-P38920  | C-Term-504 | LGDYKVPsIAADDEK            | Mh1-P38920  | Linker-480 |
| 39.96 | 1 | 1608.865 | 4 | 402.9722 | QkEFSK             | Pms1-P14242 | N-Term-159 | KLPSIK                     | Pms1-P14242 | Linker-468 |
| 39.95 | 1 | 2935.378 | 5 | 587.8818 | NSKDR              | Pms1-P14242 | N-Term-278 | RPVEYSTLLkccNEVYK          | Mh1-P14242  | N-Term-297 |
| 39.54 | 1 | 1773.925 | 4 | 444.2372 | KYmKSGNVK          | Mh1-P38920  | FRB-70     | KSISK                      | Pms1-P14242 | Linker-589 |
| 30.6  | 2 | 2965.451 | 4 | 742.1187 | DANTINDNDLKDQPKKK  | Mh1-P38920  | Linker-471 | QkLGDYK                    | Mh1-P38920  | Linker-475 |
| 30.53 | 2 | 2016.115 | 4 | 504.7847 | DQPKKK             | Mh1-P38920  | Linker-471 | VNVLNLTskk                 | Mh1-P38920  | C-Term-515 |
| 29.77 | 1 | 1551.783 | 4 | 388.7015 | VPKER              | Mh1-P38920  | C-Term-504 | QkEFSK                     | Pms1-P14242 | N-Term-159 |
| 29.71 | 1 | 2613.505 | 4 | 654.132  | TPLKNSR            | Pms1-P14242 | Linker-583 | SLPLLLkGYIPSLVK            | Mh1-P38920  | C-Term-657 |
| 29.6  | 1 | 2900.422 | 4 | 725.8613 | RQENKLVLR          | Mh1-P38920  | Linker-398 | DANTINDNDLKDQPK            | Mh1-P38920  | Linker-467 |
| 29.6  | 1 | 2041.99  | 4 | 511.2533 | LEGSNSSTPTKK       | Pms1-P14242 | Linker-467 | KTMTR                      | Pms1-P14242 | C-Term-830 |
| 29.52 | 1 | 1943.065 | 4 | 486.5222 | IkALDASVVNK        | Mh1-P38920  | N-Term-6   | VPKER                      | Mh1-P38920  | C-Term-504 |
| 29.38 | 1 | 1845.964 | 4 | 462.2468 | RQENKLVLR          | Mh1-P38920  | Linker-398 | VkEDR                      | Mh1-P38920  | N-Term-117 |
| 19.87 | 1 | 1528.812 | 4 | 382.959  | VPKER              | Mh1-P38920  | C-Term-504 | DQPKKK                     | Mh1-P38920  | Linker-471 |
| 19.76 | 1 | 1761.966 | 4 | 441.2474 | KSISK              | Pms1-P14242 | Linker-589 | RQENKLVLR                  | Mh1-P38920  | Linker-398 |
| 19.75 | 1 | 1981.026 | 4 | 496.0124 | KTMTR              | Pms1-P14242 | C-Term-830 | SSIMIGkPLNK                | Pms1-P14242 | C-Term-825 |

### Definitions

Score: MaxLinker score; see Yugandhar et al. (2020) Mol. Cell Proteomics 19, 554-568 (2020).

#CSMs: Number of cross-link spectrum matches

XL MH+: Deconvoluted mass of the cross-link. It is a standard practice to present the deconvoluted mass along with the mass of an additional H+

Z: Charge of the cross-link

XL m/z: Cross-link mass divided by its charge

Uniprot: <https://www.uniprot.org>

lower case k indicates site of cross-link

**Table S3C. Summary of intermolecular crosslinks for Mlh1-Pms1 and Complex #5.**

**Mlh1-Pms1 (15 in total, with the amino acid positions crosslinked in each subunit shown)**

Mlh1-N-Term-6 + Pms1-N-Term-83  
Mlh1-N-Term-6 + Pms1-N-Term-159  
Mlh1-Linker-398 + Pms1-Linker-583  
Mlh1-Linker-398 + Pms1-Linker-591  
Mlh1-Linker-480 + Pms1-C-Term-830  
Mlh1-Linker-489 + Pms1-C-Term-830  
Mlh1-Linker-489 + Pms1-Linker-583  
Mlh1-Linker-489 + Pms1-Linker-591  
Mlh1-C-Term-504 + Pms1-Linker-605  
Mlh1-C-Term-515 + Pms1-N-Term-278  
Mlh1-C-Term-515 + Pms1-Linker-583  
Mlh1-C-Term-515 + Pms1-Linker-589  
Mlh1-C-Term-515 + Pms1-Linker-605  
Mlh1-C-Term-717 + Pms1-C-Term-672  
Mlh1-C-Term-717 + Pms1-C-Term-830

**Complex #5 (34, with the amino acid positions crosslinked in each subunit shown)**

Mlh1-N-Term-6 + Pms1-Linker-583  
Mlh1-N-Term-6 + Pms1-Linker-589  
Mlh1-N-Term-81 + Pms1-Linker-583  
Mlh1-N-Term-117 + Pms1-N-Term-159  
Mlh1-N-Term-117 + Pms1-Linker-467  
Mlh1-N-Term-117 + Pms1-Linker-591  
Mlh1-N-Term-137 + Pms1-Linker-467  
Mlh1-N-Term-137 + Pms1-Linker-583  
Mlh1-N-Term-253 + Pms1-Linker-589  
Mlh1-Linker-398 + Pms1-Linker-583  
Mlh1-Linker-398 + Pms1-Linker-589  
Mlh1-Linker-398 + Pms1-C-Term-830  
Mlh1-Linker-446 + Pms1-Linker-583  
Mlh1-Linker-471 + Pms1-C-Term-830  
Mlh1-Linker-472 + Pms1-Linker-583  
Mlh1-Linker-480 + Pms1-C-Term-830  
Mlh1-Linker-489 + Pms1-Linker-583  
Mlh1-C-Term-504 + Pms1-N-Term-159  
Mlh1-C-Term-504 + Pms1-Linker-377  
Mlh1-C-Term-515 + Pms1-Linker-583  
Mlh1-C-Term-515 + Pms1-Linker-589  
Mlh1-C-Term-520 + Pms1-Linker-583  
Mlh1-C-Term-657 + Pms1-Linker-583  
Mlh1-C-Term-657 + Pms1-Linker-591  
Mlh1-C-Term-717 + Pms1-C-Term-830  
Mlh1-FRB-46 + Pms1-Linker-467  
Mlh1-FRB-46 + Pms1-Linker-583  
Mlh1-FRB-70 + Pms1-N-Term-159  
Mlh1-FRB-70 + Pms1-N-Term-278  
Mlh1-FRB-70 + Pms1-Linker-377  
Mlh1-FRB-70 + Pms1-Linker-467  
Mlh1-FRB-70 + Pms1-Linker-583  
Mlh1-FRB-70 + Pms1-Linker-589  
Mlh1-FRB-70 + Pms1-C-Term-830

**Table S4. Phenotypic analysis of *mlh1* and *pms1* alleles that map within or near Mlh1-Pms1 crosslinking sites (Figure 2A) as determined by XL-MS**

| Crosslinking site (amino acid position) in Mlh1 | <i>mlh1</i> allele                              | DNA mismatch repair phenotype | Reference                   |
|-------------------------------------------------|-------------------------------------------------|-------------------------------|-----------------------------|
| 6                                               | <i>R4A, K6A</i>                                 | +/-                           | Argueso <i>et al</i> , 2003 |
| 398                                             | <i>E396A, K398A</i>                             | +, but – nearby               | Argueso <i>et al</i> , 2003 |
| 480                                             | <i>D478A, K480A</i>                             | +                             | Argueso <i>et al</i> , 2003 |
| 489                                             | <i>D486A, D487A, E488A, K489A</i>               | +                             | Argueso <i>et al</i> , 2003 |
| 504                                             | <i>K504A, E505A, R506A</i>                      | +/-                           | Argueso <i>et al</i> , 2003 |
| 515                                             | <i>K515A, K516A</i>                             | +/-                           | Argueso <i>et al</i> , 2003 |
| 717                                             | <i>E714A, D715A, E716A, K717A</i>               | +                             | Argueso <i>et al</i> , 2003 |
| Crosslinking site (amino acid position) in Pms1 |                                                 |                               |                             |
| 83                                              | <i>G97A</i>                                     | -                             | Tran & Liskay, 2000         |
| 159                                             | ATP binding domain                              |                               | Arana <i>et al</i> , 2010   |
| 278                                             | Maps to DNA binding region                      |                               | Hall <i>et al</i> , 2003    |
| 583-605                                         | <i>IDR deletion (584-634)</i>                   | +/-                           | Plys <i>et al</i> , 2012    |
| 672                                             | Maps to endonuclease site                       |                               | Smith <i>et al</i> , 2013   |
| 830                                             | <i>C817R, C848S</i> ; maps to endonuclease site | -                             | Smith <i>et al</i> , 2013   |

+ indicates phenotype similar to wild-type, - indicates similar to MMR null, +/- intermediate phenotype.
